# Supplementary material for: Automatic detection of ventilatory modes during invasive mechanical ventilation
Source: Crit Care. 2016 Aug 14;20:258. doi: 10.1186/s13054-016-1436-9 (PMC4983761; doi:10.1186/s13054-016-1436-9)
Supplement: Additional file 1: — The database on which this study is based. (XLS 77 kb) [file 13054_2016_1436_MOESM1_ESM.xls]

## Sheet: Data
Patient	Center	Date	Research Team	Software	Result
1	1	2012-06-27	VCV	VCV	Correct
2	1	2012-09-11	VCV	VCV	Correct
2	1	2012-09-12	PSV	PSV	Correct
2	1	2012-09-13	PCV	PCV	Correct
2	1	2012-09-14	VCVDF	VCVDF	Correct
2	1	2012-09-15	PCV	PCV	Correct
2	1	2012-09-16	PCV	PCV	Correct
2	1	2012-09-17	PCV	PSV	Incorrect
2	1	2012-09-18	Other	Other	Correct
3	1	2012-06-05	PAV+	PAV+	Correct
3	1	2012-06-06	Other	Other	Correct
3	1	2012-06-07	VCVDF	VCVDF	Correct
3	1	2012-06-08	VCVDF	VCVDF	Correct
3	1	2012-06-09	VCVDF	VCVDF	Correct
3	1	2012-06-10	VCVDF	VCVDF	Correct
3	1	2012-06-11	VCVDF	VCVDF	Correct
3	1	2012-05-30	PSV	PSV	Correct
3	1	2012-05-31	PSV	PSV	Correct
4	1	2012-02-01	VCVDF	VCVDF	Correct
4	1	2012-02-06	VCVDF	Other	Unlabeled
4	1	2012-02-09	VCVDF	VCVDF	Correct
4	1	2012-02-10	VCVDF	VCVDF	Correct
4	1	2012-02-14	VCVDF	VCVDF	Correct
4	1	2012-02-15	VCVDF	VCVDF	Correct
4	1	2012-02-16	VCVDF	VCVDF	Correct
4	1	2012-02-17	VCVDF	VCVDF	Correct
4	1	2012-02-18	VCVDF	VCVDF	Correct
4	1	2012-02-19	VCVDF	VCVDF	Correct
4	1	2012-02-20	VCVDF	VCVDF	Correct
4	1	2012-01-21	VCV	VCV	Correct
4	1	2012-02-21	VCVDF	VCVDF	Correct
4	1	2012-02-22	VCVDF	VCVDF	Correct
4	1	2012-02-23	VCVDF	VCVDF	Correct
4	1	2012-01-24	Other	PSV	Incorrect
4	1	2012-01-25	VCV	VCV	Correct
4	1	2012-01-28	VCVDF	VCVDF	Correct
5	1	2012-08-03	VCV	VCV	Correct
6	1	2012-02-07	Other	Other	Correct
7	1	2012-12-04	VCV	VCV	Correct
7	1	2012-12-06	VCVDF	Other	Unlabeled
7	1	2012-12-07	VCVDF	VCVDF	Correct
7	1	2012-12-08	VCV	VCV	Correct
7	1	2012-12-09	PAV+	PAV+	Correct
7	1	2012-12-10	VCV	VCV	Correct
8	1	2012-11-14	VCV	VCV	Correct
8	1	2012-11-15	VCV	VCV	Correct
9	1	2012-01-01	PAV+	PAV+	Correct
9	1	2012-01-02	PSV	PSV	Correct
9	1	2012-01-03	VCVDF	VCVDF	Correct
9	1	2012-01-04	PSV	Other	Unlabeled
9	1	2012-01-05	PSV	PSV	Correct
9	1	2012-01-06	PSV	PSV	Correct
9	1	2012-01-07	PSV	PSV	Correct
9	1	2012-01-17	PSV	PSV	Correct
9	1	2011-12-22	VCV	VCV	Correct
9	1	2011-12-23	PSV	PSV	Correct
9	1	2011-12-24	VCVDF	PSV	Incorrect
9	1	2011-12-25	PSV	PSV	Correct
9	1	2011-12-26	PSV	PSV	Correct
9	1	2011-12-27	PSV	PSV	Correct
9	1	2011-12-28	PSV	PSV	Correct
9	1	2011-12-29	PAV+	PAV+	Correct
9	1	2011-12-30	PAV+	PAV+	Correct
9	1	2011-12-31	PAV+	PAV+	Correct
10	1	2012-07-04	VCV	VCV	Correct
10	1	2012-07-14	VCV	VCV	Correct
10	1	2012-07-15	VCV	VCV	Correct
10	1	2012-07-16	VCV	VCV	Correct
10	1	2012-07-17	VCV	VCV	Correct
10	1	2012-07-18	VCV	VCV	Correct
10	1	2012-07-20	VCV	VCV	Correct
10	1	2012-07-21	VCV	VCV	Correct
10	1	2012-07-22	VCV	VCV	Correct
10	1	2012-07-23	VCV	VCV	Correct
10	1	2012-07-24	PSV	PSV	Correct
10	1	2012-07-25	VCV	VCV	Correct
10	1	2012-07-26	VCV	VCV	Correct
10	1	2012-07-28	VCV	VCV	Correct
10	1	2012-07-29	VCV	VCV	Correct
10	1	2012-06-30	VCV	VCV	Correct
10	1	2012-07-30	VCV	VCV	Correct
10	1	2012-07-31	VCV	VCV	Correct
11	1	2012-01-24	PCV	Other	Unlabeled
11	1	2012-01-25	PAV+	PAV+	Correct
12	1	2012-02-28	PSV	PSV	Correct
12	1	2012-02-29	PSV	PSV	Correct
13	1	2012-02-28	VCV	VCV	Correct
14	1	2012-07-01	VCV	VCV	Correct
14	1	2012-07-02	VCV	VCV	Correct
14	1	2012-07-03	VCV	VCV	Correct
14	1	2012-07-04	VCV	VCV	Correct
14	1	2012-07-06	PAV+	PAV+	Correct
14	1	2012-07-07	PAV+	PAV+	Correct
14	1	2012-07-08	PAV+	PAV+	Correct
14	1	2012-07-09	PAV+	Other	Unlabeled
14	1	2012-07-10	VCVDF	VCVDF	Correct
14	1	2012-07-11	VCVDF	VCVDF	Correct
14	1	2012-07-12	PSV	PSV	Correct
14	1	2012-07-13	PSV	PSV	Correct
14	1	2012-07-14	VCVDF	VCVDF	Correct
14	1	2012-07-15	VCVDF	VCVDF	Correct
14	1	2012-07-16	PSV	PSV	Correct
14	1	2012-07-17	PSV	PSV	Correct
14	1	2012-07-18	VCVDF	VCVDF	Correct
14	1	2012-06-30	VCV	VCV	Correct
15	1	2012-12-29	VCV	VCV	Correct
16	1	2012-03-27	PSV	PSV	Correct
17	1	2012-05-12	PSV	PSV	Correct
17	1	2012-05-13	VCV	VCV	Correct
17	1	2012-05-14	PSV	PSV	Correct
18	1	2012-06-05	VCV	VCV	Correct
18	1	2012-06-06	VCV	VCV	Correct
18	1	2012-06-07	VCV	VCV	Correct
19	1	2012-08-08	VCV	VCV	Correct
20	1	2012-08-22	VCV	VCV	Correct
20	1	2012-08-23	VCV	VCV	Correct
20	1	2012-08-24	Other	PSV	Incorrect
20	1	2012-08-25	Other	PCV	Incorrect
20	1	2012-08-26	VCV	VCV	Correct
21	1	2012-08-17	VCV	VCV	Correct
21	1	2012-08-18	VCV	VCV	Correct
21	1	2012-08-19	VCV	VCV	Correct
21	1	2012-08-20	PSV	PSV	Correct
21	1	2012-08-21	PSV	PSV	Correct
22	1	2012-09-01	VCVDF	VCVDF	Correct
22	1	2012-09-02	VCVDF	VCVDF	Correct
22	1	2012-09-03	VCVDF	VCVDF	Correct
22	1	2012-09-04	PSV	PSV	Correct
22	1	2012-09-07	PSV	PSV	Correct
22	1	2012-09-08	PSV	PSV	Correct
22	1	2012-09-09	PSV	PSV	Correct
22	1	2012-09-10	PSV	PSV	Correct
22	1	2012-09-11	PSV	PSV	Correct
22	1	2012-09-12	PSV	PSV	Correct
22	1	2012-08-27	VCV	VCV	Correct
22	1	2012-08-28	VCV	VCV	Correct
22	1	2012-08-29	VCV	VCV	Correct
22	1	2012-08-30	VCV	VCV	Correct
22	1	2012-08-31	VCVDF	VCVDF	Correct
23	1	2012-11-10	VCV	VCV	Correct
24	1	2012-09-24	PSV	Other	Unlabeled
25	1	2012-10-02	VCV	VCV	Correct
26	1	2012-10-12	VCV	VCV	Correct
26	1	2012-10-13	VCV	VCV	Correct
26	1	2012-10-14	VCV	VCV	Correct
26	1	2012-10-15	VCV	VCV	Correct
27	1	2012-10-22	VCV	VCV	Correct
27	1	2012-10-23	VCV	VCV	Correct
28	1	2012-10-25	VCV	VCV	Correct
28	1	2012-10-27	PSV	PSV	Correct
29	1	2012-11-01	VCV	VCV	Correct
29	1	2012-10-31	VCV	VCV	Correct
30	1	2012-11-07	VCVDF	VCVDF	Correct
30	1	2012-11-08	VCVDF	VCVDF	Correct
30	1	2012-11-09	VCVDF	VCVDF	Correct
30	1	2012-11-10	VCV	VCV	Correct
30	1	2012-11-11	VCV	VCV	Correct
30	1	2012-11-12	VCV	VCV	Correct
30	1	2012-11-13	VCV	VCV	Correct
30	1	2012-11-14	VCV	VCV	Correct
31	1	2012-11-06	PSV	PSV	Correct
31	1	2012-11-07	VCV	VCV	Correct
32	1	2012-12-28	VCV	VCV	Correct
33	1	2012-11-23	PAV+	Other	Unlabeled
33	1	2012-11-24	PAV+	PAV+	Correct
34	1	2012-11-28	VCV	VCV	Correct
35	1	2012-12-06	VCV	VCV	Correct
35	1	2012-12-07	VCV	VCV	Correct
35	1	2012-12-08	VCV	VCV	Correct
36	1	2012-12-08	VCV	VCV	Correct
36	1	2012-12-09	VCV	VCV	Correct
36	1	2012-12-10	VCV	VCV	Correct
36	1	2012-12-11	VCV	VCV	Correct
37	1	2012-12-12	VCV	VCV	Correct
38	1	2012-12-17	VCV	VCV	Correct
39	1	2012-12-21	VCV	VCV	Correct
40	1	2012-12-20	VCVDF	VCVDF	Correct
40	1	2012-12-21	VCVDF	VCVDF	Correct
40	1	2012-12-22	VCV	VCV	Correct
40	1	2012-12-28	VCV	VCV	Correct
41	1	2012-12-28	VCV	VCV	Correct
41	1	2012-12-29	PAV+	PAV+	Correct
42	1	2013-01-01	VCV	VCV	Correct
42	1	2013-01-02	VCV	VCV	Correct
42	1	2013-01-03	VCV	VCV	Correct
43	2	2012-08-09	VCV	VCV	Correct
43	2	2012-08-10	VCV	VCV	Correct
43	2	2012-08-11	VCV	VCV	Correct
43	2	2012-08-12	VCV	VCV	Correct
43	2	2012-08-13	VCV	VCV	Correct
43	2	2012-08-14	VCV	VCV	Correct
43	2	2012-08-15	VCV	VCV	Correct
43	2	2012-08-16	PSV	PSV	Correct
43	2	2012-08-17	PSV	PSV	Correct
43	2	2012-08-18	PSV	PSV	Correct
43	2	2012-08-19	PSV	PSV	Correct
44	2	2012-08-22	VCV	VCV	Correct
45	2	2012-08-25	VCV	VCV	Correct
45	2	2012-08-26	PSV	PSV	Correct
46	2	2012-10-01	VCV	VCV	Correct
46	2	2012-10-02	VCV	VCV	Correct
46	2	2012-10-03	VCV	VCV	Correct
46	2	2012-10-04	VCV	VCV	Correct
46	2	2012-10-05	PSV	PSV	Correct
46	2	2012-09-25	PSV	PSV	Correct
46	2	2012-09-26	VCV	VCV	Correct
46	2	2012-09-27	VCV	VCV	Correct
46	2	2012-09-28	VCV	VCV	Correct
46	2	2012-09-29	VCV	VCV	Correct
46	2	2012-09-30	VCV	VCV	Correct
47	2	2012-06-01	Other	Other	Correct
47	2	2012-06-02	PCV	PCV	Correct
47	2	2012-06-03	PCV	PCV	Correct
47	2	2012-05-25	VCVDF	PCV	Incorrect
47	2	2012-05-26	PCV	PCV	Correct
47	2	2012-05-27	VCVDF	PCV	Incorrect
47	2	2012-05-28	PCV	PCV	Correct
47	2	2012-05-29	PCV	PCV	Correct
47	2	2012-05-30	PCV	Other	Unlabeled
47	2	2012-05-31	Other	Other	Correct
48	2	2012-01-17	PSV	PSV	Correct
48	2	2012-01-18	PSV	PSV	Correct
48	2	2012-01-19	PSV	PSV	Correct
48	2	2012-01-20	PSV	PSV	Correct
48	2	2012-01-21	PSV	PSV	Correct
49	2	2011-10-04	VCV	VCV	Correct
49	2	2011-10-05	PSV	PSV	Correct
49	2	2011-10-06	PSV	PSV	Correct
49	2	2011-10-07	PSV	PSV	Correct
49	2	2011-10-08	PSV	PSV	Correct
50	2	2011-10-18	VCV	VCV	Correct
50	2	2011-10-19	VCVDF	VCVDF	Correct
50	2	2011-10-20	PCV	PCV	Correct
50	2	2011-10-21	PSV	PSV	Correct
50	2	2011-10-22	PSV	PSV	Correct
50	2	2011-10-25	PSV	Other	Unlabeled
50	2	2011-10-26	VCV	VCV	Correct
50	2	2011-10-27	VCV	VCV	Correct
50	2	2011-10-28	PSV	PSV	Correct
50	2	2011-10-29	PSV	PSV	Correct
51	2	2011-11-15	VCVDF	Other	Unlabeled
51	2	2011-11-16	PSV	PSV	Correct
51	2	2011-11-17	CPAP	CPAP	Correct
51	2	2011-11-18	CPAP	CPAP	Correct
51	2	2011-11-19	CPAP	CPAP	Correct
51	2	2011-11-20	VCV	VCV	Correct
51	2	2011-11-21	VCV	VCV	Correct
52	2	2011-12-20	VCV	VCV	Correct
52	2	2011-12-22	VCV	VCV	Correct
52	2	2011-12-23	PSV	PSV	Correct
53	2	2012-12-13	VCV	VCV	Correct
53	2	2012-12-14	VCV	VCV	Correct
53	2	2012-12-15	VCV	Other	Unlabeled
53	2	2012-12-16	VCV	VCV	Correct
53	2	2012-12-17	CPAP	CPAP	Correct
53	2	2012-12-18	CPAP	CPAP	Correct
53	2	2012-12-19	CPAP	CPAP	Correct
53	2	2012-12-20	PSV	PSV	Correct
54	2	2012-10-01	PSV	PSV	Correct
54	2	2012-10-02	PSV	PSV	Correct
54	2	2012-10-03	PSV	PSV	Correct
54	2	2012-09-18	VCV	VCV	Correct
54	2	2012-09-19	VCV	VCV	Correct
54	2	2012-09-20	VCV	VCV	Correct
54	2	2012-09-21	VCV	VCV	Correct
54	2	2012-09-22	VCV	VCV	Correct
54	2	2012-09-23	VCV	VCV	Correct
54	2	2012-09-24	VCV	VCV	Correct
54	2	2012-09-25	VCV	VCV	Correct
54	2	2012-09-26	VCV	VCV	Correct
54	2	2012-09-27	PSV	PSV	Correct
54	2	2012-09-28	PSV	PSV	Correct
54	2	2012-09-29	PSV	PSV	Correct
54	2	2012-09-30	VCV	VCV	Correct
55	2	2012-06-01	PSV	Other	Unlabeled
55	2	2012-06-05	Other	Other	Correct
55	2	2012-06-07	Other	Other	Correct
55	2	2012-05-08	PCV	PCV	Correct
55	2	2012-06-08	Other	Other	Correct
55	2	2012-05-09	PCV	Other	Unlabeled
55	2	2012-06-09	PSV	PSV	Correct
55	2	2012-05-10	PCV	VCVDF	Incorrect
55	2	2012-06-10	PSV	PSV	Correct
55	2	2012-05-11	PCV	PCV	Correct
55	2	2012-06-11	Other	Other	Correct
55	2	2012-05-12	PCV	PCV	Correct
55	2	2012-05-13	PCV	PCV	Correct
55	2	2012-06-13	Other	Other	Correct
55	2	2012-05-14	PCV	VCVDF	Incorrect
55	2	2012-06-14	Other	Other	Correct
55	2	2012-05-15	PSV	PSV	Correct
55	2	2012-06-15	PSV	PSV	Correct
55	2	2012-05-16	PCV	Other	Unlabeled
55	2	2012-06-16	Other	Other	Correct
55	2	2012-05-17	PSV	PSV	Correct
55	2	2012-06-17	Other	Other	Correct
55	2	2012-05-18	PSV	PSV	Correct
55	2	2012-06-18	Other	Other	Correct
55	2	2012-05-19	PSV	PSV	Correct
55	2	2012-06-19	Other	Other	Correct
55	2	2012-05-20	VCV	VCV	Correct
55	2	2012-06-20	Other	Other	Correct
55	2	2012-05-21	VCV	VCV	Correct
55	2	2012-06-21	Other	Other	Correct
55	2	2012-05-22	PSV	Other	Unlabeled
55	2	2012-06-22	Other	Other	Correct
55	2	2012-05-23	PSV	PCV	Incorrect
55	2	2012-06-23	Other	Other	Correct
55	2	2012-05-24	PSV	PSV	Correct
55	2	2012-06-24	Other	Other	Correct
55	2	2012-05-25	PSV	VCVDF	Incorrect
55	2	2012-06-25	Other	Other	Correct
55	2	2012-05-26	PSV	Other	Unlabeled
55	2	2012-05-27	PSV	PSV	Correct
55	2	2012-05-28	PSV	Other	Unlabeled
55	2	2012-05-29	VCV	VCV	Correct
55	2	2012-05-30	PSV	Other	Unlabeled
55	2	2012-05-31	PSV	Other	Unlabeled
56	2	2012-05-03	PCV	PCV	Correct
56	2	2012-05-04	PCV	PCV	Correct
56	2	2012-05-06	PSV	PSV	Correct
57	2	2012-10-12	VCV	VCV	Correct
57	2	2012-10-13	VCV	VCV	Correct
57	2	2012-10-14	PCV	PCV	Correct
57	2	2012-10-15	PCV	PCV	Correct
58	2	2012-11-03	VCV	VCV	Correct
58	2	2012-11-04	VCV	VCV	Correct
58	2	2012-11-05	VCV	VCV	Correct
58	2	2012-11-06	PCV	Other	Unlabeled
58	2	2012-11-07	PCV	VCVDF	Incorrect
58	2	2012-11-08	PCV	PCV	Correct
58	2	2012-11-09	PCV	Other	Unlabeled
58	2	2012-11-10	VCVDF	Other	Unlabeled
58	2	2012-11-11	VCVDF	PCV	Incorrect
58	2	2012-11-12	VCVDF	VCVDF	Correct
58	2	2012-11-13	VCVDF	Other	Unlabeled
58	2	2012-11-14	VCVDF	VCVDF	Correct
58	2	2012-10-31	PCV	PCV	Correct
59	2	2012-03-01	VCV	VCV	Correct
59	2	2012-03-02	VCV	VCV	Correct
59	2	2012-02-16	VCV	VCV	Correct
59	2	2012-02-17	VCV	VCV	Correct
59	2	2012-02-18	VCV	VCV	Correct
59	2	2012-02-19	VCV	VCV	Correct
59	2	2012-02-20	VCV	VCV	Correct
59	2	2012-02-21	VCV	VCV	Correct
59	2	2012-02-22	PCV	PCV	Correct
59	2	2012-02-23	PSV	PCV	Incorrect
59	2	2012-02-24	VCV	VCV	Correct
59	2	2012-02-25	VCV	VCV	Correct
59	2	2012-02-26	VCV	VCV	Correct
59	2	2012-02-27	VCV	VCV	Correct
59	2	2012-02-28	VCV	VCV	Correct
59	2	2012-02-29	VCV	VCV	Correct
60	2	2012-03-13	VCV	VCV	Correct
60	2	2012-03-14	VCV	VCV	Correct
60	2	2012-03-15	VCV	VCV	Correct
60	2	2012-03-16	Other	Other	Correct
60	2	2012-03-17	PSV	PCV	Incorrect
60	2	2012-03-18	Other	PCV	Incorrect
60	2	2012-03-19	PCV	PCV	Correct
60	2	2012-03-20	PCV	PCV	Correct
60	2	2012-03-21	Other	Other	Correct
60	2	2012-03-22	PCV	PCV	Correct
60	2	2012-03-23	Other	PCV	Incorrect
60	2	2012-03-24	PCV	PCV	Correct
60	2	2012-03-25	PCV	VCVDF	Incorrect
60	2	2012-03-26	PCV	PCV	Correct
60	2	2012-03-27	PCV	PCV	Correct
60	2	2012-03-28	PCV	Other	Unlabeled
60	2	2012-03-29	PCV	VCVDF	Incorrect
60	2	2012-03-30	Other	PCV	Incorrect
60	2	2012-03-31	PCV	PCV	Correct
61	2	2012-06-08	PSV	PSV	Correct
61	2	2012-06-09	VCV	VCV	Correct
62	2	2012-04-13	VCV	VCV	Correct
62	2	2012-04-14	VCV	VCV	Correct
62	2	2012-04-15	VCV	VCV	Correct
62	2	2012-04-16	VCV	VCV	Correct
63	2	2012-04-01	VCV	VCV	Correct
63	2	2012-04-02	PSV	Other	Unlabeled
63	2	2012-04-03	VCV	VCV	Correct
63	2	2012-04-04	VCV	VCV	Correct
63	2	2012-04-05	VCV	VCV	Correct
63	2	2012-04-06	PCV	PCV	Correct
63	2	2012-04-07	PCV	PCV	Correct
63	2	2012-04-08	PCV	PCV	Correct
63	2	2012-04-09	PCV	PCV	Correct
63	2	2012-03-28	VCV	VCV	Correct
63	2	2012-03-29	VCV	VCV	Correct
63	2	2012-03-30	VCV	VCV	Correct
63	2	2012-03-31	VCV	VCV	Correct
64	2	2011-11-29	PSV	PSV	Correct
65	2	2012-03-01	VCV	VCV	Correct
65	2	2012-03-02	VCV	Other	Unlabeled
65	2	2012-03-03	VCV	VCV	Correct
65	2	2012-03-04	VCV	Other	Unlabeled
65	2	2012-03-05	PSV	PSV	Correct
65	2	2012-02-29	VCV	VCV	Correct
66	2	2011-12-13	PCV	Other	Unlabeled
66	2	2011-12-14	PCV	PCV	Correct
66	2	2011-12-15	PSV	PSV	Correct
66	2	2011-12-16	VCV	VCV	Correct
66	2	2011-12-17	VCV	VCV	Correct
67	2	2012-06-06	VCVDF	Other	Unlabeled
67	2	2012-06-07	VCV	Other	Unlabeled
67	2	2012-05-24	VCV	VCV	Correct
67	2	2012-05-25	VCV	VCV	Correct
67	2	2012-05-26	VCV	VCV	Correct
67	2	2012-05-27	VCV	VCV	Correct
67	2	2012-05-28	VCV	VCV	Correct
67	2	2012-05-29	PCV	PCV	Correct
67	2	2012-05-30	PCV	PCV	Correct
67	2	2012-05-31	VCV	VCV	Correct
68	2	2011-11-03	VCV	VCV	Correct
68	2	2011-11-04	VCV	VCV	Correct
68	2	2011-11-05	VCV	VCV	Correct
68	2	2011-11-06	VCV	Other	Unlabeled
68	2	2011-11-07	PSV	PSV	Correct
68	2	2011-11-08	PSV	PSV	Correct
68	2	2011-11-09	PSV	PSV	Correct
68	2	2011-11-10	VCV	VCV	Correct
69	2	2011-12-01	VCV	VCV	Correct
69	2	2011-12-02	VCV	VCV	Correct
69	2	2011-11-03	PSV	Other	Unlabeled
69	2	2011-12-03	VCV	VCV	Correct
69	2	2011-11-04	VCV	VCV	Correct
69	2	2011-12-04	VCV	VCV	Correct
69	2	2011-11-05	VCV	VCV	Correct
69	2	2011-12-05	VCV	VCV	Correct
69	2	2011-11-06	VCV	VCV	Correct
69	2	2011-11-07	VCV	VCV	Correct
69	2	2011-11-08	VCV	VCV	Correct
69	2	2011-12-08	VCV	VCV	Correct
69	2	2011-11-09	VCV	VCV	Correct
69	2	2011-11-10	PSV	PSV	Correct
69	2	2011-11-12	VCV	VCV	Correct
69	2	2011-11-13	VCV	VCV	Correct
69	2	2011-11-14	VCV	VCV	Correct
69	2	2011-10-15	VCV	VCV	Correct
69	2	2011-11-15	VCV	VCV	Correct
69	2	2011-10-16	VCV	VCV	Correct
69	2	2011-11-16	VCV	VCV	Correct
69	2	2011-10-17	VCV	VCV	Correct
69	2	2011-11-17	VCV	VCV	Correct
69	2	2011-10-18	VCV	VCV	Correct
69	2	2011-11-18	VCV	VCV	Correct
69	2	2011-10-19	VCV	VCV	Correct
69	2	2011-11-19	VCV	VCV	Correct
69	2	2011-10-20	VCV	VCV	Correct
69	2	2011-11-20	VCV	VCV	Correct
69	2	2011-10-21	VCV	VCV	Correct
69	2	2011-11-21	VCV	VCV	Correct
69	2	2011-10-22	VCV	VCV	Correct
69	2	2011-11-22	VCV	VCV	Correct
69	2	2011-11-23	VCV	VCV	Correct
69	2	2011-11-24	VCV	VCV	Correct
69	2	2011-11-25	VCV	VCV	Correct
69	2	2011-11-26	VCV	VCV	Correct
69	2	2011-11-27	VCV	VCV	Correct
69	2	2011-11-28	VCV	VCV	Correct
69	2	2011-11-29	VCV	VCV	Correct
69	2	2011-11-30	VCV	VCV	Correct
70	2	2012-03-06	VCV	VCV	Correct
70	2	2012-03-07	VCV	VCV	Correct
71	2	2012-04-20	VCV	VCV	Correct
71	2	2012-04-21	VCV	VCV	Correct
71	2	2012-04-22	VCV	VCV	Correct
72	2	2012-05-11	VCV	VCV	Correct
72	2	2012-05-12	VCV	VCV	Correct
72	2	2012-05-13	VCV	VCV	Correct
72	2	2012-05-14	VCV	VCV	Correct
72	2	2012-05-15	PCV	PCV	Correct
72	2	2012-05-16	VCVDF	Other	Unlabeled
72	2	2012-05-18	PCV	PCV	Correct
73	2	2012-12-12	VCV	VCV	Correct
73	2	2012-12-13	VCV	VCV	Correct
73	2	2012-12-14	VCV	VCV	Correct
73	2	2012-12-15	VCV	VCV	Correct
73	2	2012-12-16	VCV	VCV	Correct
73	2	2012-12-17	VCV	VCV	Correct
73	2	2012-12-18	VCV	VCV	Correct
73	2	2012-12-19	VCV	VCV	Correct
73	2	2012-12-20	PSV	PSV	Correct
73	2	2012-12-21	PSV	PSV	Correct
73	2	2012-12-22	PSV	PSV	Correct
